# Supplementary material for: Total mercury bias in soil analysis by CV-AFS: causes, consequences and a simple solution based on sulfhydryl cotton fiber as a clean-up step
Source: Royal Society of Chemistry journal article supplement (doi:10.1039/d0ay01035a), 2020-01-01
Supplement: d0ay01035a1.pdf [file d0ay01035a1.pdf]

## Supplementary Tables

**Table 1 Supplementary.** Matrix effect analysis on simple calibrated curve and standard addition for PACS-2 and 2704 reference materials.

|                                        | Slope Values |       |       | Statistical Values |              |       |            |
|----------------------------------------|--------------|-------|-------|--------------------|--------------|-------|------------|
|                                        | m1           | m2    | m3    | F cal              | F tab        | t cal | t tab      |
| <b>• No matrix used</b>                |              |       |       |                    |              |       |            |
| Synthetic Calibration Curve            | 14.23        | 14.72 | 14.51 | -                  | -            | -     | -          |
| <b>• Standard addition over matrix</b> |              |       |       |                    |              |       |            |
| Curve PACS-2                           | 14.04        | 13.84 | 14.04 | 4.98               | <b>161.4</b> | 2.61  | <b>4.3</b> |
| Curve 2704 Sediment River              | 14.3         | 14.23 | 14.29 | 9.56               | <b>161.4</b> | 1.18  | <b>4.3</b> |
